# Supplementary material for: Expression and regulation of ATF6α in the mouse uterus during embryo implantation
Source: PubMed Central journal article supplement (PMC5055674; doi:10.1186/s12958-016-0199-0), 2016-10-07

Additional file 1

**S1**

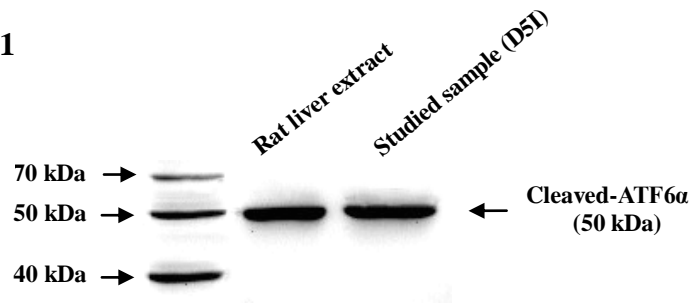

**S2**

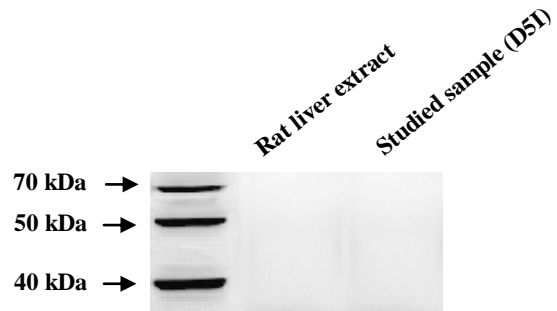

Supplement: 12958_2016_199_MOESM1_ESM.pdf [file 12958_2016_199_MOESM1_ESM.pdf]
